# Supplementary material
Source: MDPI journal article supplement (https://www.mdpi.com/2073-4344/12/6/598)
Supplement: s1 [file s1]

## Supplementary Materials

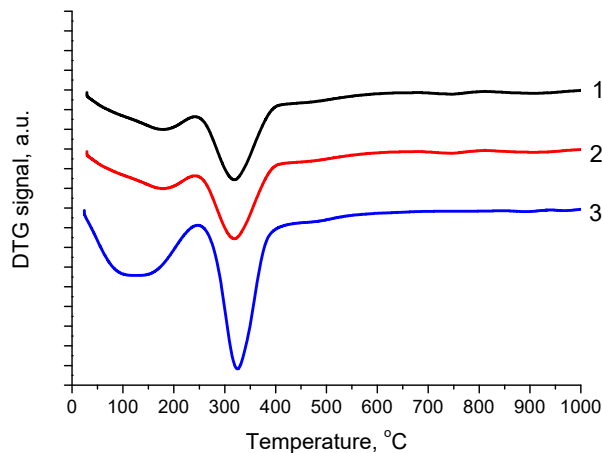

**Figure S1.** DTG profiles of NiAl-LDHs with the Ni:Al atomic ratio of 2 (line 1), 3 (line 2), and 4 (line 3) (thermal analysis in air).

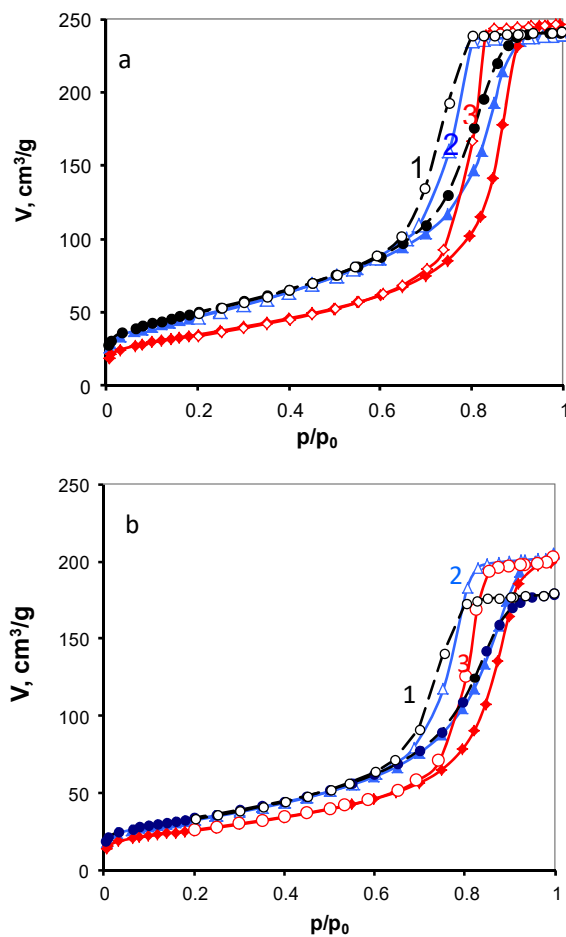

**Figure S2.** The adsorption-desorption isotherms for the samples with Ni:Al = 2 (a) and 4 (b). 1 –NiAlO<sub>x</sub> obtained by calcination of NiAl LDH at 600 °C; 2 – Ni@NiAlO<sub>x</sub> obtained

by calcination of NiAl LDH at 600 °C and subsequent reduction with H<sub>2</sub> at 500 °C; 3 – Ni@NiAlO<sub>x</sub> obtained by calcination of NiAl LDH at 600 °C and subsequent reduction with H<sub>2</sub> at 600 °C

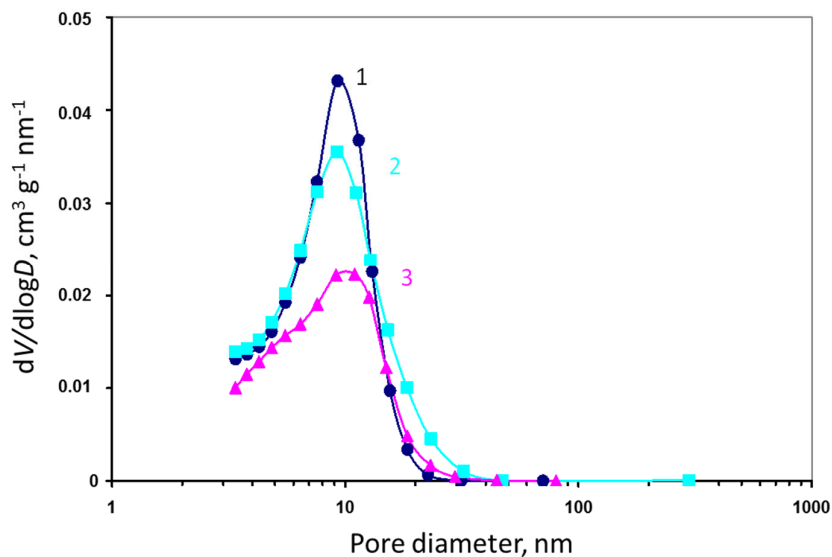

**Figure S3.** Pore size distribution curves calculated by the BJH method from the adsorption branch for NiAlO<sub>x</sub> samples obtained from NiAl LDHs with different Ni:Al atomic ratios: Ni:Al = 2 (1), Ni:Al = 3 (2), Ni:Al = 4 (3). All the samples were calcined at 600 °C.

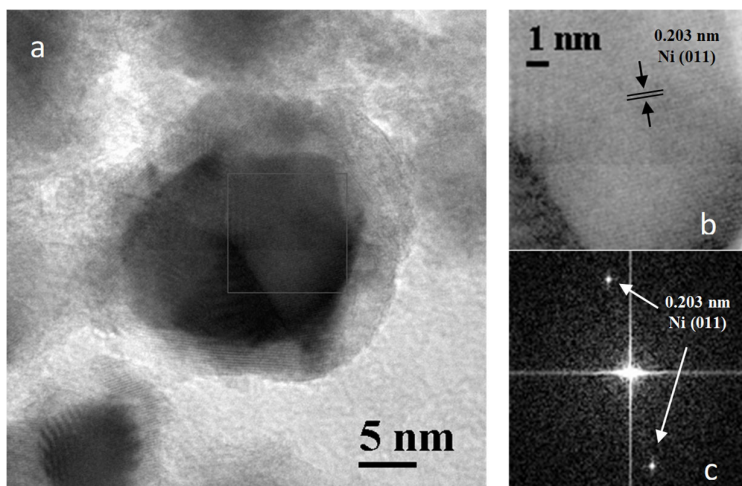

**Figure S4.** TEM image of a Ni/NiAlO<sub>x</sub>-4-600 sample reduced at 600°C (a); the area of the Ni nanoparticle is marked with a square (b); FFT obtained from the TEM image of the crystal lattice (c).

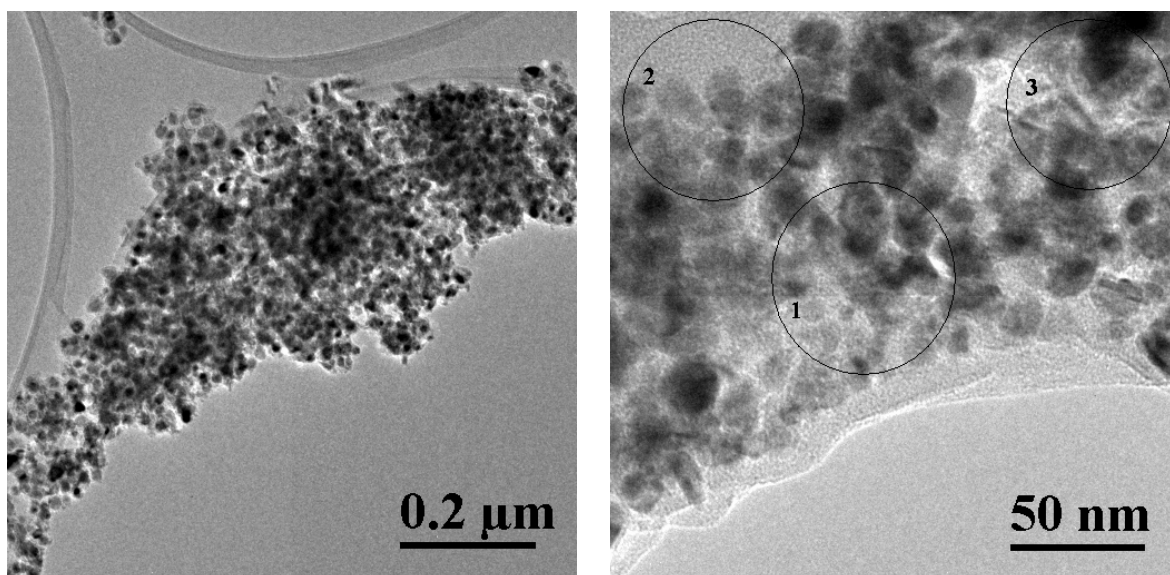

**Figure S5.** TEM images of the Ni@NiAlO<sub>x</sub>-4-600 sample at various magnifications. The circles indicate the areas in which the EDX analysis was performed (the quantitative data for these areas are shown in Table S2).

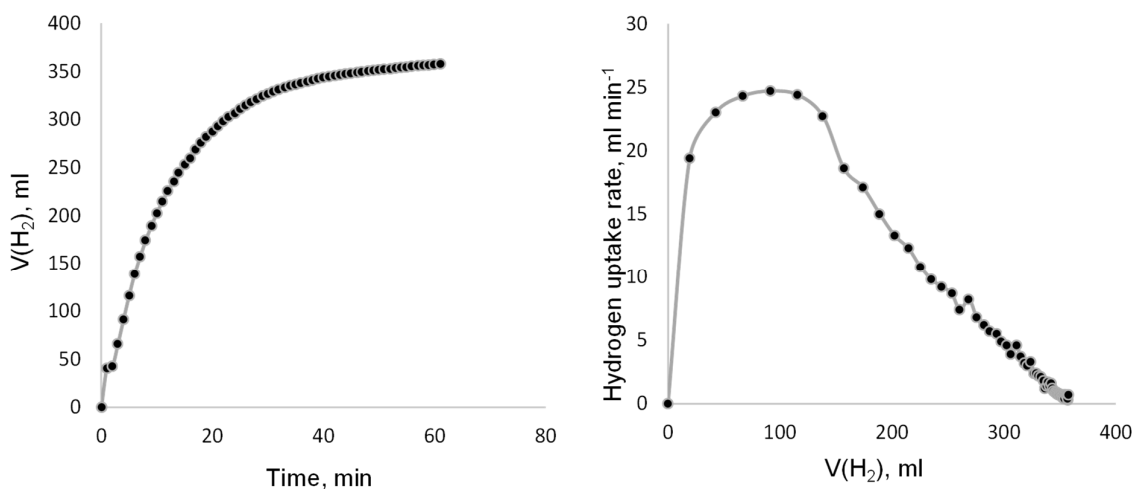

**Figure S6.** Hydrogen consumption curves *vs.* time (a) and hydrogen consumption rate *vs.* volume of hydrogen consumed (b) recorded during aqueous-phase hydrogenation of FAL (90 °C, 2.0 MPa) over 50%Ni/⊙-Al<sub>2</sub>O<sub>3</sub> preliminarily calcined at 600 °C and reduced at 600 °C.

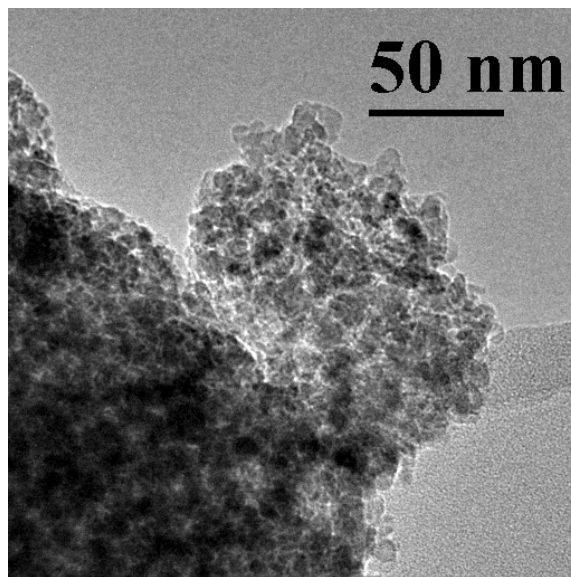

**Figure S7.** TEM image of 10%Ni/MgAlO<sub>x</sub> sample (Mg:Al = 3, calcination temperature of 600 °C, reduction temperature of 600 °C).

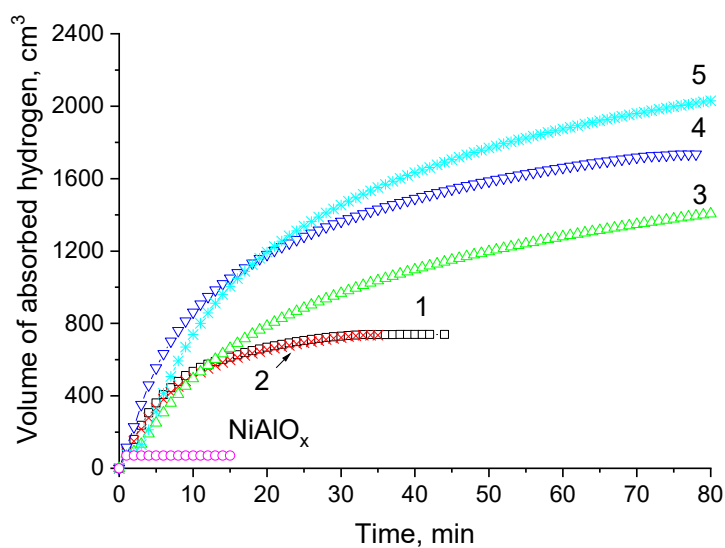

**Figure S8.** The volume of consumed hydrogen *vs.* the time in hydrogenation of FAL for the samples: 1 – Ni@NiAlO<sub>x</sub>-2-500, 2 – Ni@NiAlO<sub>x</sub>-3-500, 3 – Ni@NiAlO<sub>x</sub>-3-600, 4 – Ni@NiAlO<sub>x</sub>-4-500, 5 – Ni@NiAlO<sub>x</sub>-4-600

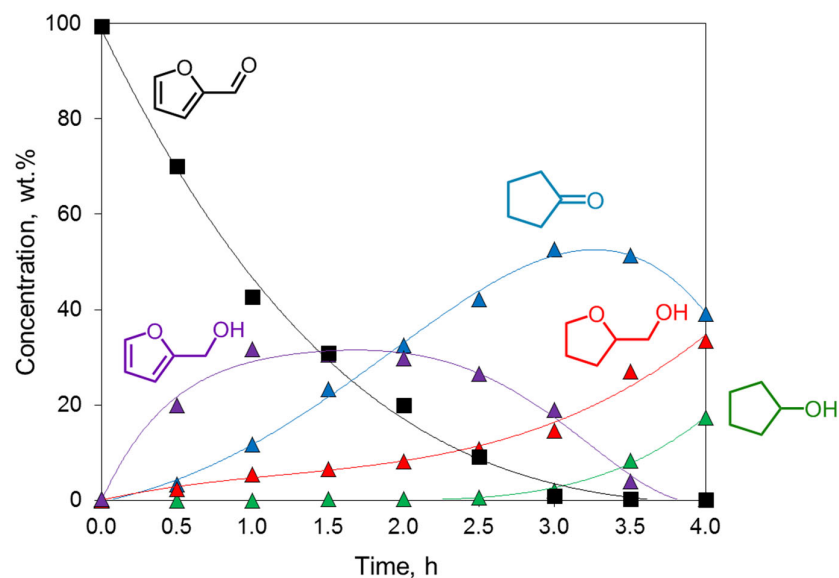

**Fig. S9.** Reaction composition-time profile of FAL hydrogenation over the Ni@NiAlO<sub>x</sub>-4-500 catalyst at a temperature of 150 °C and pressure of 3.0 MPa. The concentration of components in the reaction solutions was found by GC.

**Table S1.** Main textural characteristics of samples differing in the Ni:Al atomic ratio and thermal treatment conditions. According to nitrogen adsorption-desorption at -196 °C.

| Sample                       | Calcination temperature, °C | Reduction temperature, °C | $S_{\text{BET}}$ , m <sup>2</sup> g <sup>-1</sup> | $V_{\text{ads}}$ , cm <sup>3</sup> g <sup>-1</sup> | $D_{\text{av}}$ , nm |
|------------------------------|-----------------------------|---------------------------|---------------------------------------------------|----------------------------------------------------|----------------------|
| NiAlO <sub>x</sub> -2        | 600                         | -                         | 179                                               | 0.37                                               | 8.3                  |
| NiAlO <sub>x</sub> -3        | 600                         | -                         | 178                                               | 0.68                                               | 15.3                 |
| NiAlO <sub>x</sub> -4        | 600                         | -                         | 122                                               | 0.28                                               | 9.1                  |
| Ni@NiAlO <sub>x</sub> -2-500 | 600                         | 500                       | 171                                               | 0.37                                               | 8.9                  |
| Ni@NiAlO <sub>x</sub> -2-600 | 600                         | 600                       | 125                                               | 0.38                                               | 12.5                 |
| Ni@NiAlO <sub>x</sub> -4-    | 600                         | 500                       | 119                                               | 0.31                                               | 10.5                 |

|                              |     |     |    |      |      |
|------------------------------|-----|-----|----|------|------|
| 500                          |     |     |    |      |      |
| Ni@NiAlO <sub>x</sub> -4-600 | 600 | 600 | 94 | 0.31 | 13.1 |

**Table S2.** TPR data for NiAlO<sub>x</sub> samples (pre-calcination temperature 550 °C).

| Sample                | T <sub>max</sub> of TPR, °C | Total amount of consumed H <sub>2</sub> , mmol·g <sup>-1</sup> * | Reduction degree, %** |
|-----------------------|-----------------------------|------------------------------------------------------------------|-----------------------|
| NiAlO <sub>x</sub> -2 | 500                         | 4.9                                                              | 55                    |
| NiAlO <sub>x</sub> -2 | 650                         | 9.6                                                              | 105                   |
| NiAlO <sub>x</sub> -2 | 900                         | 10.9                                                             | 120                   |
| NiAlO <sub>x</sub> -3 | 650                         | 9.8                                                              | 93                    |
| NiAlO <sub>x</sub> -3 | 900                         | 11.5                                                             | 108                   |
| NiAlO <sub>x</sub> -4 | 650                         | 11.5                                                             | 105                   |
| NiAlO <sub>x</sub> -4 | 900                         | 11.9                                                             | 108                   |

\* The observed some excess amount of consumed hydrogen is probably due to the solubility of hydrogen in metallic nickel (R.B. McLellan, P.L. Sutter, Thermodynamics of the hydrogen-nickel system, Acta Metall. 32 (1984) 2233e2239).

\*\* evaluated from reaction: NiO+H<sub>2</sub>→Ni+H<sub>2</sub>O

**Table S3.** Results of EDX analysis of various regions of the Ni@NiAlO<sub>x</sub>-4-600 sample on TEM images with the calculation of the atomic ratio of elements.

| Area no.       | Content, wt.% |     |      | Ni:Al | Ni:O |
|----------------|---------------|-----|------|-------|------|
|                | O             | Al  | Ni   |       |      |
| 1 <sup>a</sup> | 20.6          | 8.9 | 70.5 | 4.0   | 0.9  |
| 2 <sup>a</sup> | 37.8          | 8.7 | 53.6 | 3.0   | 0.4  |
| 3 <sup>a</sup> | 15.3          | 8.4 | 76.4 | 4.3   | 1.3  |
| 4              | 22.9          | 7.7 | 69.4 | 4.0   | 0.9  |
| 5              | 19.0          | 6.8 | 74.2 | 4.3   | 1.1  |

|   |      |      |      |     |     |
|---|------|------|------|-----|-----|
| 6 | 21.8 | 8.7  | 69.5 | 4.0 | 0.9 |
| 7 | 19.1 | 8.2  | 72.8 | 4.0 | 1.0 |
| 8 | 21.9 | 7.2  | 70.9 | 4.0 | 0.9 |
| 9 | 17.4 | 10.1 | 72.5 | 3.0 | 1.1 |

<sup>a</sup> These areas are shown in Figure S4.
